# Supplementary material for: Cardiovascular Risks of Androgen Deprivation Therapy for Prostate Cancer
Source: PubMed Central journal article supplement — World J Mens Health. 2020 Aug 18;39(3):429–43. doi: 10.5534/wjmh.200109 (PMC8255402; doi:10.5534/wjmh.200109), 2020-08-18
Supplement: wjmh-39-429-s001.pdf [file wjmh-39-429-s001.pdf]

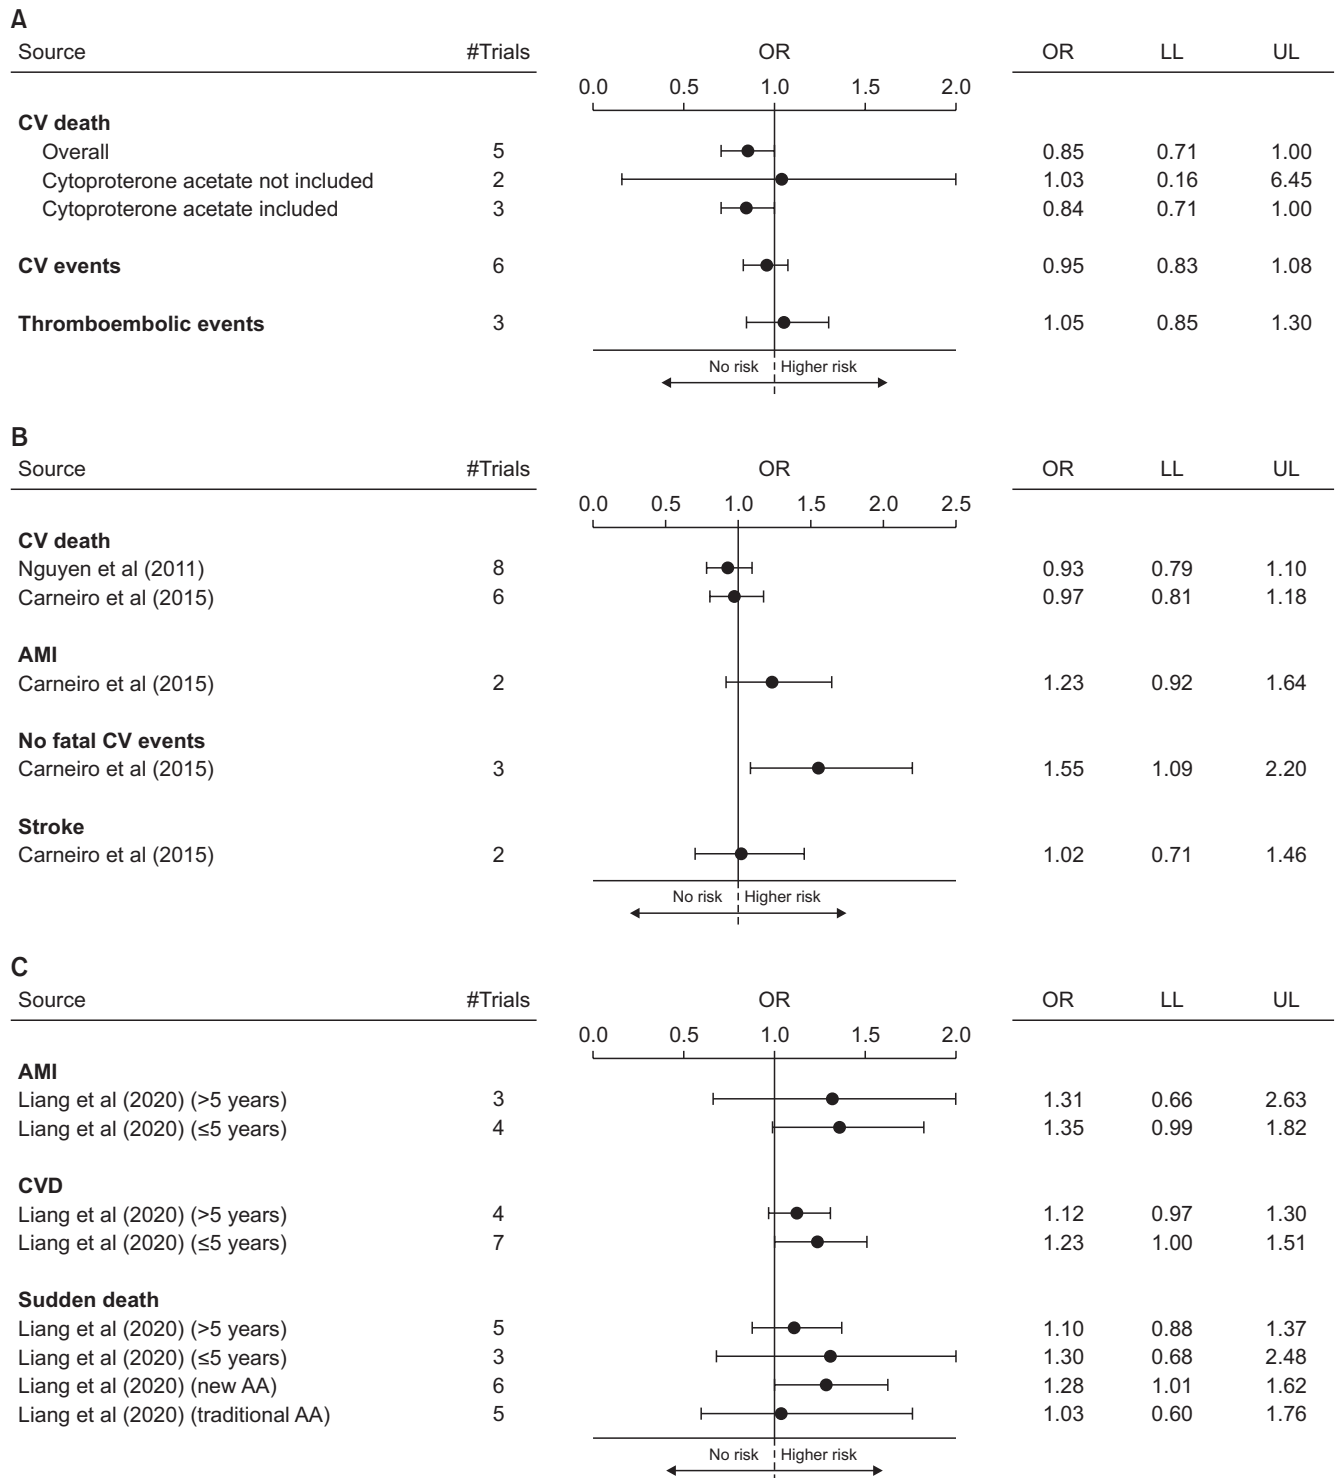

**Supplement Fig. 1.** Forest plot of estimated odds ratio (OR) (95% confidence intervals) for cardiovascular (CV) mortality and morbidity in men under continuous vs. intermittent androgen deprivation therapy (ADT) (A); when only randomized controlled trials were considered (B) or according ADT duration or type (C). AMI: acute myocardial infarction, CVD: CV diseases.
